# Supplementary material for: Risk factors and between-hospital variation of caesarean section in Denmark: a cohort study
Source: PubMed Central journal article supplement — BMJ Open. 2018 Feb 10;8(2):e019120. doi: 10.1136/bmjopen-2017-019120 (PMC5829888; doi:10.1136/bmjopen-2017-019120), 2018-02-10
Supplement: bmjopen-2017-019120supp001.pdf [file bmjopen-2017-019120supp001.pdf]

**Table S1.** Definition of mode of delivery based on diagnostic and procedure codes.

|                          | <b>Text</b>                                                             | <b>Vaginal birth</b> | <b>Elective CS</b> | <b>Emergency CS</b> |
|--------------------------|-------------------------------------------------------------------------|----------------------|--------------------|---------------------|
| <b>Diagnostic codes</b>  |                                                                         |                      |                    |                     |
| [D]O80*                  | Spontaneous singleton birth                                             | X                    | -                  | -                   |
| [D]O81*                  | Singleton birth: instrumental extraction (forceps or vacuum extraction) | X                    | -                  | -                   |
| [D]O82.0                 | Singleton birth by elective CS                                          | -                    | X                  | -                   |
| [D]O82* without [D]O82.0 | Singleton birth by CS (except elective CS)                              | -                    | -                  | X                   |
| [D]O83*                  | Other forms of singleton birth                                          | X                    | -                  | -                   |
| <b>Procedure codes</b>   |                                                                         |                      |                    |                     |
| KMCA10A                  | CS in isthmus uteri performed as acute procedure before birth           | -                    | -                  | X                   |
| KMCA10B                  | CS in isthmus uteri performed as planned procedure before birth         | -                    | X                  | -                   |
| KMCA10C                  | CS before birth in isthmus uteri with exit technique                    | -                    | -                  | X                   |
| KMCA10D                  | CS in isthmus uteri during birth due to pregnancy complication/s        | -                    | -                  | X                   |
| KMCA10E                  | CS in isthmus uteri during birth due to birth complication/s            | -                    | -                  | X                   |

CS=caesarean section.

"X"=code is permitted. "-"= code is not permitted.

Diagnostic codes according to the International Classification of Diseases (ICD-10), where \* indicates inclusion of all subcodes. Note that codes in the Danish version of ICD-10 have leading letter [D].

Procedure codes according to the NOMESCO classification system of surgical procedures.
