# Supplementary material for: Risk factors and between-hospital variation of caesarean section in Denmark: a cohort study
Source: PubMed Central journal article supplement — BMJ Open. 2018 Feb 10;8(2):e019120. doi: 10.1136/bmjopen-2017-019120 (PMC5829888; doi:10.1136/bmjopen-2017-019120), 2018-02-10
Supplement: bmjopen-2017-019120supp002.pdf [file bmjopen-2017-019120supp002.pdf]

**Table S2.** Definition of risk factors. Percentages are based on 226 612 included deliveries. Where appropriate, the reference category used in logistic regression models is indicated. Note that codes in the Danish version of the ICD-10 have leading letter [D].

| <b>Risk factor</b>                                        | <b>Coding</b>                                                                                                                                                                                                                                                                                                                                  |
|-----------------------------------------------------------|------------------------------------------------------------------------------------------------------------------------------------------------------------------------------------------------------------------------------------------------------------------------------------------------------------------------------------------------|
| <b>Year</b>                                               | 2009 ( <i>reference</i> ), 2010, 2011, 2012                                                                                                                                                                                                                                                                                                    |
| <b>Size of maternity unit</b>                             | Small, medium ( <i>reference</i> ), large: Large units (N=7) had more than 3000 births in all but one active year (some hospital units were closed between 2009 and 2012, i.e. had less than four active years), small units had less than 1100 births in all but one active year (N=6). Remaining units (N=16) are classified as medium size. |
| <b>Weekend delivery (yes)</b>                             | Weekend includes Saturday, Sunday and all national holidays                                                                                                                                                                                                                                                                                    |
| <b>Night delivery (yes)</b>                               | Deliveries between 8.00 p.m. and 7.59 a.m.. Missing values (N=1110, 0%) are treated as daytime deliveries.                                                                                                                                                                                                                                     |
| <b>Maternal age (years)</b>                               | Categories: 15-19, 20-34 ( <i>reference</i> ), 35-44                                                                                                                                                                                                                                                                                           |
| <b>Maternal prenatal smoking (yes)</b>                    | Missing values (N=3990, 2%) are treated as non-smokers.                                                                                                                                                                                                                                                                                        |
| <b>Maternal BMI</b>                                       | Categories following WHO definition: 14.0-18.4, 18.5-24.9 ( <i>reference</i> ), 25.0-29.9, 30-34.9, 35+. Missing values (N=6700, 3%) are treated as normal BMI (18.5-24.9).                                                                                                                                                                    |
| <b>Maternal height &lt;=163 cm (yes)</b>                  | Low height is defined as the 25% quantile for all included women. Maternal height outside range of 140-205 cm (N=246, 0%) or missing (N=5335, 2%) is treated as maternal height > 163 cm.                                                                                                                                                      |
| <b>Parity</b>                                             | Categories according to the number and mode of previous deliveries: nulliparous, multiparous without previous CS ( <i>reference</i> ), and multiparous with previous CS. Missing values (N=2282, 1%) are treated as nulliparous.                                                                                                               |
| <b>Complication factors</b>                               |                                                                                                                                                                                                                                                                                                                                                |
| Maternal diabetes (both pre-existing and gestational)     | Based on ICD-10 diagnoses [D]E10*, [D]E11*, [D]E12*, [D]E14*, [D]O24*.                                                                                                                                                                                                                                                                         |
| Maternal hypertension (both pre-existing and gestational) | Based on ICD-10 diagnoses [D]O10*, [D]O11*, [D]O13*, [D]O16*.                                                                                                                                                                                                                                                                                  |
| Pre-eclampsia/Eclampsia                                   | Based on ICD-10 diagnoses [D]O14*, [D]O15*.                                                                                                                                                                                                                                                                                                    |
| Placenta praevia                                          | Based on ICD-10 diagnoses [D]O44*.                                                                                                                                                                                                                                                                                                             |
| Placental abruption                                       | Based on ICD-10 diagnoses [D]O45*.                                                                                                                                                                                                                                                                                                             |
| Premature rupture of membranes                            | Based on ICD-10 diagnoses [D]O42*.                                                                                                                                                                                                                                                                                                             |
| <b>Complication (yes)</b>                                 | At least one of the complication factors is present.                                                                                                                                                                                                                                                                                           |
| <b>Stimulated labor (yes)</b>                             | Based on recording of syntocinon infusion during labour (NOMESCO code BKHD3*).                                                                                                                                                                                                                                                                 |
| <b>Any induced labor (yes)</b>                            | Based on recording of either induction by medication (NOMESCO code BKHD2*) or procedure (NOMESCO code KMAC00 or KMAC96a).                                                                                                                                                                                                                      |
| <b>Term</b>                                               | Categories based on gestational age at delivery: < 37 weeks + 0 days, 37 weeks + 0 days till 41 weeks + 6 days ( <i>reference</i> ), >= 42 weeks + 0 days. Missing values are treated as normal term.                                                                                                                                          |
| <b>Female baby (yes)</b>                                  | Missing values (N=206, 0%) are randomly assigned female gender with probability 0.49 (outcome: 109 assigned females).                                                                                                                                                                                                                          |
| <b>Breech presentation (yes)</b>                          | All presentations beside cephalic presentation. Includes shoulder presentation (N=405, 0%). Inconsistent values (N=426, 0%) are treated as breech presentation and missing values (N=675, 0%) are treated as cephalic presentation.                                                                                                            |
| <b>Fetal distress (yes)</b>                               | Based on ICD-10 code [D]O68*: Labour and delivery complicated by fetal stress distress.                                                                                                                                                                                                                                                        |
| <b>Cephalopelvic disproportion (yes)</b>                  | Based on ICD-10 code [D]O65*: Obstructed labour due to maternal pelvic abnormality.                                                                                                                                                                                                                                                            |
| <b>Macrosomia (yes)</b>                                   | Birth weight above 4500 grams. Missing values (N=1572, 1%) are treated as weight below 4500 grams.                                                                                                                                                                                                                                             |
